# Supplementary material
Source: MDPI journal article supplement (https://www.mdpi.com/2311-7524/7/11/458)
Supplement: s1 [file s1]

## Article

# Supplementary Materials: *RsSOS1* Responding to Salt Stress Might Be Involved in Regulating Salt Tolerance by Maintaining Na<sup>+</sup> Homeostasis in Radish (*Raphanus sativus* L.)

Wanting Zhang †, Jingxue Li †, Junhui Dong †, Yan Wang, Liang Xu, Kexin Li, Xiaofang Yi, Yuelin Zhu \* and Liwang Liu \*

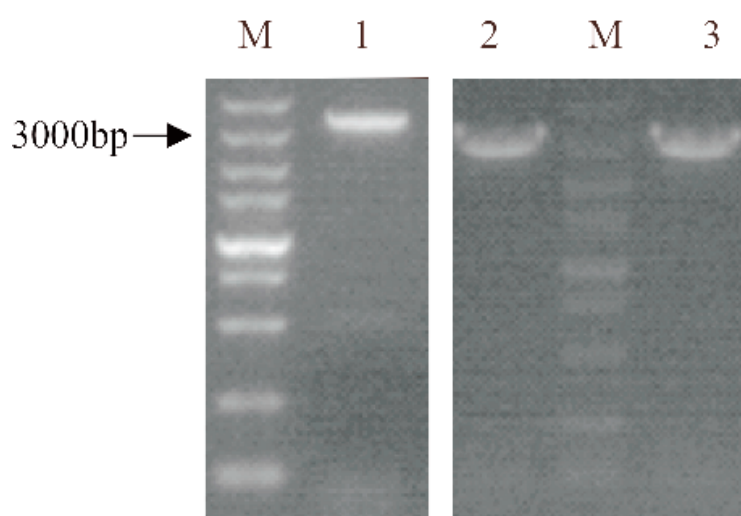

**Figure S1.** Isolation of *RsSOS1* gene. M, DL5000 Marker; 1, amplification of *RsSOS1* CDS; 2, DNA fragment 1 amplification of *RsSOS1*; 3, DNA fragment 2 amplification of *RsSOS1*.

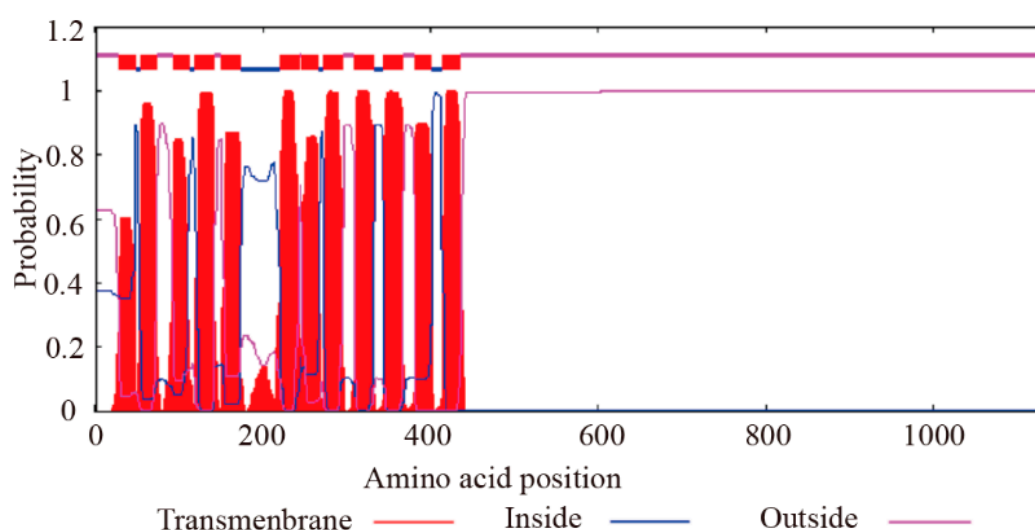

**Figure S2.** Predicted transmembrane domain of *RsSOS1* protein.

Table S1. Primers used in this study.

| Name                   | Sequence (5'-3')                                              | Usage                                                           |
|------------------------|---------------------------------------------------------------|-----------------------------------------------------------------|
| <i>RsSOS1-F</i>        | atacacc <del>aaatcgactctaga</del> ATGGCGACTGTAATCGACGC        | cloning of <i>RsSOS1</i> combined with pCAMBIA1300 vector       |
| <i>RsSOS1-R</i>        | gcccttgctcaccat <del>ggtacc</del> CATATCATTCCTGAAAACGATGGT    |                                                                 |
| 1300-F                 | AGCAAGAACGGAATGCGCGTGAC                                       | Vector universal primers to identify positive clones and plants |
| 1300-R                 | TTGCCGGTGGTGCAGATGAACTTC                                      |                                                                 |
| <i>RsSOS1-DNA1-F</i>   | ATGGCGACTGTAATCGACGC                                          | isolation of fragment 1 of <i>RsSOS1</i> DNA                    |
| <i>RsSOS1-DNA1-R</i>   | TTGTGGCTGGTAAACCATCCA                                         |                                                                 |
| <i>RsSOS1-DNA2-F</i>   | GTTTATTTTCTTCACAGGTGGAATTG                                    | isolation of fragment 2 of <i>RsSOS1</i> DNA                    |
| <i>RsSOS1-DNA2-R</i>   | TCACATATCATTCCTGAAAACGATG                                     |                                                                 |
| <i>RsSOS1-qRT-F</i>    | TGCTGACTGGCCTACAGTTG                                          | RT-qPCR of <i>RsSOS1</i>                                        |
| <i>RsSOS1-qRT-R</i>    | CCCAGTAAGCTGCCTGAACA                                          |                                                                 |
| <i>RsActin-qRT-R</i>   | GCATCACACTTTCTACAAC                                           | RT-qPCR of reference gene <i>RsActin</i>                        |
| <i>RsActin-qRT-F</i>   | CCTGGATAGCAACATACAT                                           |                                                                 |
| <i>RsSOS1-RT-R</i>     | AGGGATCGGCTCTGGCTTTTG                                         | RT-PCR of <i>RsSOS1</i>                                         |
| <i>RsSOS1-RT-F</i>     | ATAGCCAACACGACACAGCA                                          |                                                                 |
| <i>RsActin-RT-F</i>    | TGGCATCACACTTTCTACAA                                          | RT-PCR of reference gene <i>RsActin</i>                         |
| <i>RsActin-RT-R</i>    | GATATCCACATCACACTTCAT                                         |                                                                 |
| <i>RsSOS1-JM-F</i>     | gggaatattaagctt <del>ggtacc</del> ATGGCGACTGTAATCGACGC        | cloning of <i>RsSOS1</i> combined with pYes2 vector             |
| <i>RsSOS1-JM-R</i>     | tacatgatgcggccct <del>tctaga</del> TCACATATCATTCCTGAAAACGATG  |                                                                 |
| <i>RsSOS1Δ999-JM-F</i> | gggaatattaagctt <del>ggtacc</del> ATGGCGACTGTAATCGACGC        | cloning of <i>RsSOS1Δ999</i> combined with pYes2 vector         |
| <i>RsSOS1Δ999-JM-R</i> | tacatgatgcggccct <del>tctaga</del> TCAACTAGATGATCTCTGGAGCTGTT |                                                                 |

Note: tctaga is recognition site of *Xba* I; ggtacc is recognition site of *Kpn* I.
